# Supplementary material
Source: PubMed Central journal article supplement (PMC3801081)
Supplement: 1315862110_pnas.201315862SI.pdf [file 1315862110_pnas.201315862SI.pdf]

# Supporting Information

Wang et al. 10.1073/pnas.1315862110

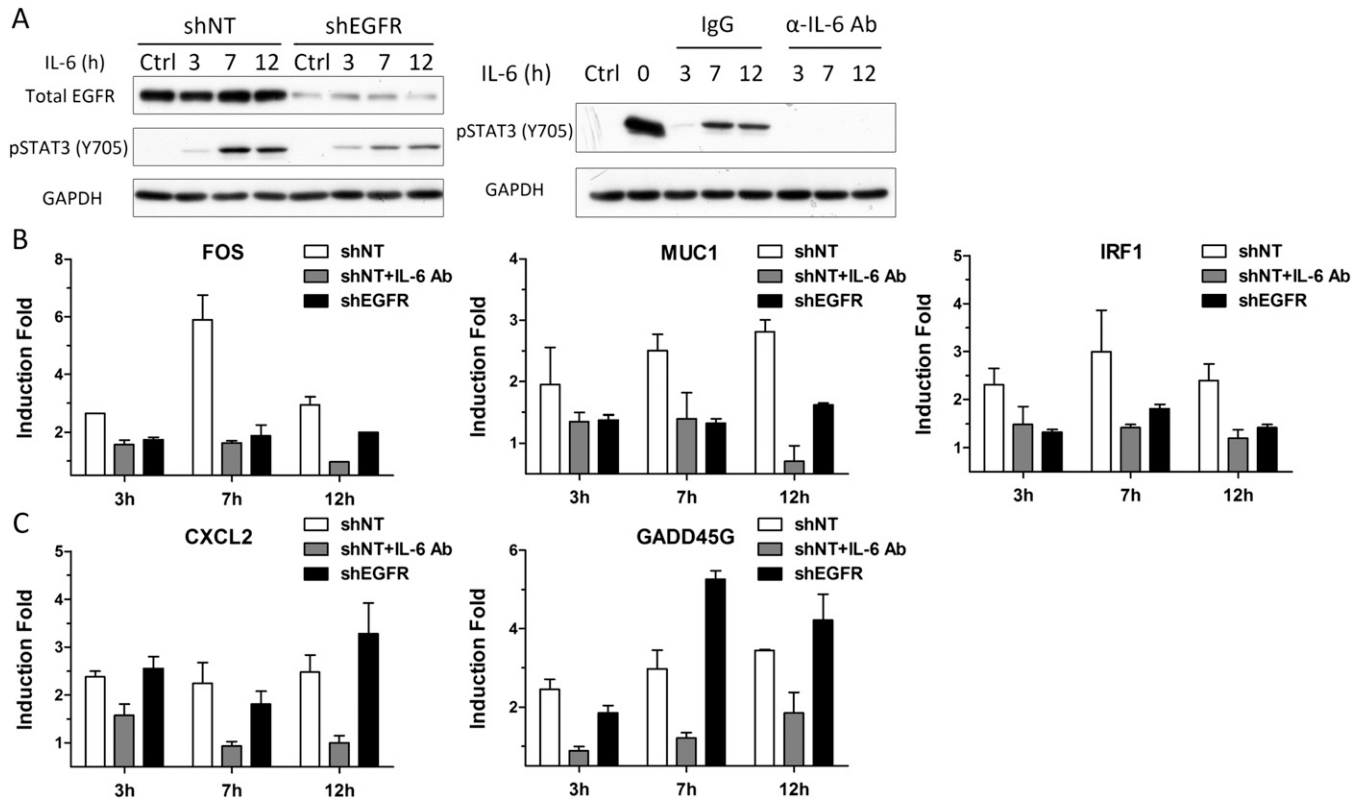

**Fig. S1.** Analysis of gene expression. DLD1 (colon cancer cells) were transfected with shRNA against epidermal growth factor receptor (EGFR) or scrambled shRNA (shNT), treated with IL-6 (100 ng/mL) for 30 min, followed by washout and replacement of the medium, with or without anti-human IL-6. (A) Analysis of the second wave and the effects of anti-IL-6 and EGFR knockdown. Each experiment was carried out two independent times, with results similar to the representative examples that are shown. (B and C) mRNA analysis by real-time PCR. Values are the means  $\pm$  SD from three independent experiments.

## Other Supporting Information Files

[Table S1 \(DOC\)](#)
